# Supplementary material for: Development of MALDI-TOF mass spectrometry for the identification of lice isolated from farm animals
Source: PubMed Central journal article supplement (PMC7191974; doi:10.1051/parasite/2020026), 2020-04-30
Supplement: parasite-27-28-s1.pdf [file parasite-27-28-s1.pdf]

**Supplementary data 1.** MALDI-TOF MS identification of louse species excluded from the final analyses.

| Host           | Species                  | Percentage of<br>excluded specimens | LSVs<br>obtain<br>ed<br>from<br>blind<br>tests<br>against<br>Databa<br>se | Percen<br>tage of<br>correct<br>identifi<br>cation |
|----------------|--------------------------|-------------------------------------|---------------------------------------------------------------------------|----------------------------------------------------|
| Mammal<br>lice | <i>Haematopin<br/>us</i> | 2 (10%)                             | [1.687-<br>1.878]                                                         | 1/2<br>(50%)                                       |
|                | <i>eurysternus</i>       |                                     | -1.782                                                                    |                                                    |
|                | <i>Solenopotes</i>       | 9 (13.23%)                          | [1.304-<br>1.698]                                                         | 7/9<br>(77.77<br>%)                                |
|                | <i>Capillatus</i>        |                                     | -1.561                                                                    |                                                    |
|                | <i>Linognathus</i>       | 10 (28.57)                          | [1.198-<br>1.781]                                                         | 9/10<br>(90%)                                      |
|                | <i>vituli</i>            |                                     | 1.596                                                                     |                                                    |
|                | <i>Linognathus</i>       | 4 (19.05%)                          | [1.242-<br>1.613]                                                         | 3/4<br>(75%)                                       |
|                | <i>africanus</i>         |                                     | -1.432                                                                    |                                                    |
|                | <i>Bovicola</i>          | 12 (26.66)                          | [1.269-<br>2.031]                                                         | 8/12<br>(66.66                                     |
|                | <i>caprae</i>            |                                     |                                                                           |                                                    |

|              |                      |              |         |        |
|--------------|----------------------|--------------|---------|--------|
|              |                      |              | 1.573   | %)     |
|              | <i>Bovicola</i>      | 11 (27.5%)   | [1.321- | 3/11(2 |
|              | <i>bovis</i>         |              | 2.729]  | 7.27%) |
|              |                      |              | 1.811   |        |
|              | <i>Bovicola ovis</i> | 39 (40.62%)  | [1.188- | 21/39  |
|              |                      |              | 2.658]  | (53.84 |
|              |                      |              | 1.403   | %)     |
| Poultry lice | <i>Goniocotes</i>    | /            | /       | /      |
|              | <i>gallinae</i>      |              |         |        |
|              | <i>Goniodes</i>      | /            | /       | /      |
|              | <i>gigas</i>         |              |         |        |
|              | <i>Menopon</i>       | 3 (18.75%)   | [1.605- | 3/3    |
|              | <i>gallinae</i>      |              | 1.803]  | (100%) |
|              |                      |              | -1.691  |        |
|              | <i>Menacanthu</i>    | 4 (40%)      | [1.075- | 0%     |
|              | <i>s stramineus</i>  |              | 1.439]  |        |
|              |                      |              | 1.276   |        |
|              | <i>Chelopistes</i>   | 3/18 (37.5%) | [1.536- | 0%     |
|              | <i>meleagridis</i>   |              | 1.627]  |        |
|              |                      |              | -1.594  |        |
|              | <i>Lipeurus</i>      | 6 (75%)      | /       | /      |
|              | <i>caponis</i>       |              |         |        |
| Human lice   | 13                   | 103 (25.25%) | 1.572   | 55/90  |
|              |                      |              |         | (61.11 |

%)
